# Supplementary material for: An intrinsic synthesis parameter governing the crystallization of silico(zinco)aluminophosphate molecular sieves
Source: Royal Society of Chemistry journal article supplement (doi:10.1039/d1sc02431k), 2021-01-01
Supplement: d1sc02431k1.pdf [file d1sc02431k1.pdf]

**Electronic Supporting Information**  
**for**  
**An Intrinsic Synthesis Parameter Governing the Crystallization of**  
**Silico(zinco)aluminophosphate Molecular Sieves**

Sung Hwan Park, Kingsley Christian Kemp, Jingeon Hong, Jung Gi Min, and Suk Bong Hong\*

Center for Ordered Nanoporous Materials Synthesis, Division of Environmental Science and  
Engineering, POSTECH, Pohang 37673, Korea

**Table S1.** Changes in the pH of the representative SAPO and ZnAPO synthesis mixtures before and after molecular sieve crystallization

| run <sup>a</sup> | pH      |       | product <sup>b</sup> |
|------------------|---------|-------|----------------------|
|                  | initial | final |                      |
| 1                | 12.6    | 12.1  | Na-SAPO-LTA          |
| 2                | 12.3    | 11.9  | Na-SAPO-LTA          |
| 3                | 12.5    | 12.3  | Na-SAPO-LTA          |
| 4                | 12.8    | 12.6  | Na-SAPO-LTA          |
| 11               | 11.4    | 11.1  | Na-SAPO-LTA          |
| 12               | 11.6    | 11.4  | Na-SAPO-LTA          |
| 13               | 11.6    | 11.5  | Na-SAPO-LTA          |
| 14               | 10.3    | 9.9   | Na-SAPO-FAU/EMT      |
| 15               | 10.3    | 10.3  | NaTMA-SAPO-FAU       |
| 16               | 10.6    | 10.5  | NaTEA-SAPO-FAU/EMT   |
| 17               | 9.3     | 10.0  | Na-SAPO-CHA          |
| 18               | 9.5     | 9.8   | Na-SAPO-CHA          |
| 19               | 8.4     | 9.0   | Na-SAPO-CHA          |
| 23               | 10.4    | 10.9  | Na-ZnAPO-CZP         |
| 30               | 10.5    | 10.7  | Na-ZnAPO-CZP         |
| 31               | 9.6     | 10.2  | Na-ZnAPO-CZP         |
| 32               | 8.3     | 8.4   | Na-ZnAPO-CZP         |
| 33               | 7.3     | 7.5   | Na-ZnAPO-CZP         |
| 34               | 7.3     | 7.4   | Na-ZnAPO-CZP         |
| 35               | 7.4     | 7.3   | Na-ZnAPO-SOD         |

<sup>a</sup>The same as the run number in Table 1. <sup>b</sup>TMA, tetramethylammonium; TEA, tetraethylammonium.

**Table S2.** N<sub>2</sub> sorption data for a series of SAPO or ZnAPO amorphous materials.

| sample          | run <sup>a</sup> | BET surface area<br>(m <sup>2</sup> g <sup>-1</sup> ) | Micropore volume<br>(cm <sup>3</sup> g <sup>-1</sup> ) <sup>b</sup> | Mesopore volume<br>(cm <sup>3</sup> g <sup>-1</sup> ) <sup>c</sup> |
|-----------------|------------------|-------------------------------------------------------|---------------------------------------------------------------------|--------------------------------------------------------------------|
| SAPO amorphous  | 20               | 19                                                    | 0                                                                   | 0.07                                                               |
| SAPO amorphous  | 22               | 55                                                    | 0                                                                   | 0.25                                                               |
| ZnAPO amorphous | 36               | 35                                                    | 0                                                                   | 0.17                                                               |
| ZnAPO amorphous | 38               | 33                                                    | 0                                                                   | 0.15                                                               |

<sup>a</sup>The same as the synthesis run numbers in the main text Table 1. <sup>b</sup>In the diameter range  $\leq 20$  Å. <sup>c</sup>In the diameter range 20- to 500-Å. Calculated using the BJH formalism.

**Table S3.** pH-adjusted SAPO molecular sieve synthesis conditions and results

| run             | NaOH/P <sub>2</sub> O <sub>5</sub> | SiO <sub>2</sub> /P <sub>2</sub> O <sub>5</sub> | H <sub>2</sub> O/Al <sub>2</sub> O <sub>3</sub> | T/t (°C/h) | pH      |       | product <sup>a</sup> |
|-----------------|------------------------------------|-------------------------------------------------|-------------------------------------------------|------------|---------|-------|----------------------|
|                 |                                    |                                                 |                                                 |            | initial | final |                      |
| 39              | 6.11                               | 1.67                                            | 110                                             | 150/24     | 13.5    | 13.4  | D + Na-SAPO-LTA      |
| 40 <sup>b</sup> | 6.11                               | 1.67                                            | 110                                             | 150/24     | 12.5    | 12.9  | D + Na-SAPO-LTA      |
| 41              | 6.11                               | 3.06                                            | 110                                             | 150/24     | 13.7    | 13.3  | D + Na-SAPO-LTA      |
| 42 <sup>b</sup> | 6.11                               | 3.06                                            | 110                                             | 150/24     | 12.5    | 12.6  | D + Na-SAPO-LTA      |
| 43              | 2.78                               | 0.28                                            | 200                                             | 150/336    | 7.6     | 8.4   | A                    |
| 44 <sup>b</sup> | 2.78                               | 0.28                                            | 200                                             | 150/336    | 8.5     | 8.9   | A                    |
| 45              | 2.78                               | 1.67                                            | 200                                             | 150/336    | 7.8     | 8.5   | A                    |
| 46 <sup>b</sup> | 2.78                               | 1.67                                            | 200                                             | 150/336    | 8.5     | 9.0   | A                    |

<sup>a</sup>The product appearing first is the major phase. A and D indicate amorphous and dense (i.e., cristobalite) phases, respectively. <sup>b</sup>The initial pH of synthesis gels with different compositions, where the P<sub>2</sub>O<sub>5</sub>/Al<sub>2</sub>O<sub>3</sub> ratio was fixed to 0.9, was adjusted to 12.5 (or 8.5) by adding a small amount of HNO<sub>3</sub> (or TMAOH or TEAOH)).

**Table S4.** Representative SAPO molecular sieve synthesis conditions and results using gels with an extended  $P_2O_5/Al_2O_3$  ratio of 0.60 or 1.05

| run | gel composition <sup>a</sup> |                |                |                | <i>t</i> (h) | product <sup>b</sup>      |
|-----|------------------------------|----------------|----------------|----------------|--------------|---------------------------|
|     | $P_2O_5/Al_2O_3$             | NaOH/ $P_2O_5$ | $SiO_2/P_2O_5$ | $H_2O/Al_2O_3$ |              |                           |
| 47  | 0.60                         | 6.66           | 1.25           | 110            | 24           | D                         |
| 48  | 0.60                         | 5.83           | 1.25           | 110            | 24           | D + Na-SAPO-SOD           |
| 49  | 0.60                         | 5.33           | 1.25           | 110            | 216          | Na-SAPO-SOD + Na-SAPO-CHA |
| 50  | 0.60                         | 4.33           | 1.25           | 110            | 120          | Na-SAPO-CHA + Na-SAPO-SOD |
| 51  | 0.60                         | 3.33           | 1.25           | 110            | 120          | Na-SAPO-CHA               |
| 52  | 0.60                         | 2.50           | 1.25           | 110            | 336          | A + (Na-SAPO-CHA)         |
| 53  | 0.60                         | 2.78           | 1.25           | 110            | 336          | A                         |
| 54  | 1.05                         | 6.66           | 1.90           | 110            | 12           | D                         |
| 55  | 1.05                         | 5.71           | 1.90           | 110            | 12           | D + Na-SAPO-SOD           |
| 56  | 1.05                         | 5.33           | 1.90           | 110            | 48           | Na-SAPO-SOD + Na-SAPO-LTA |
| 57  | 1.05                         | 4.76           | 1.90           | 110            | 48           | Na-SAPO-LTA               |
| 58  | 1.05                         | 3.33           | 1.90           | 110            | 120          | Na-SAPO-CHA + Na-SAPO-GIS |
| 59  | 1.05                         | 2.86           | 1.90           | 110            | 336          | A + (Na-SAPO-GIS)         |
| 60  | 1.05                         | 2.38           | 1.90           | 110            | 336          | A                         |

<sup>a</sup>Crystallization was performed at 150 °C under static conditions. <sup>b</sup>The product appearing first is the major phase, and that obtained in a trace amount is given in parentheses. A and D indicate amorphous and dense (i.e., cristobalite) phases, respectively.

**Table S5.** Representative SAPO molecular sieve synthesis conditions and results using Rb<sup>+</sup> or Cs<sup>+</sup> ions as an ISDA gel composition<sup>a</sup>

| run | M               | MOH/P <sub>2</sub> O <sub>5</sub> | SiO <sub>2</sub> /P <sub>2</sub> O <sub>5</sub> | H <sub>2</sub> O/Al <sub>2</sub> O <sub>3</sub> | t (h) | product <sup>b</sup> |
|-----|-----------------|-----------------------------------|-------------------------------------------------|-------------------------------------------------|-------|----------------------|
| 61  | Rb <sup>+</sup> | 6.11                              | 1.25                                            | 110                                             | 24    | D                    |
| 62  | Rb <sup>+</sup> | 5.56                              | 1.25                                            | 110                                             | 120   | Rb-SAPO-MER + (D)    |
| 63  | Rb <sup>+</sup> | 4.45                              | 1.25                                            | 110                                             | 120   | Rb-SAPO-MER          |
| 64  | Rb <sup>+</sup> | 3.33                              | 1.25                                            | 110                                             | 168   | Rb-SAPO-MER          |
| 65  | Rb <sup>+</sup> | 2.78                              | 1.25                                            | 110                                             | 120   | A                    |
| 66  | Cs <sup>+</sup> | 6.11                              | 1.25                                            | 110                                             | 336   | D + (Cs-SAPO-ANA)    |
| 67  | Cs <sup>+</sup> | 5.56                              | 1.25                                            | 110                                             | 336   | Cs-SAPO-ANA + (D)    |
| 68  | Cs <sup>+</sup> | 4.33                              | 1.90                                            | 110                                             | 120   | Cs-SAPO-ANA          |
| 69  | Cs <sup>+</sup> | 3.33                              | 1.90                                            | 110                                             | 168   | Cs-SAPO-ANA          |
| 70  | Cs <sup>+</sup> | 2.78                              | 1.90                                            | 110                                             | 336   | A + (Cs-SAPO-ANA)    |

<sup>a</sup>Crystallization was performed at 150 °C under rotation (60 rpm), using SAPO gels with P<sub>2</sub>O<sub>5</sub>/Al<sub>2</sub>O<sub>3</sub> = 0.90. <sup>b</sup>The product appearing first is the major phase, and that obtained in a trace amount is given in parentheses. A and D indicate amorphous and dense (i.e., cristobalite) phases, respectively.

**Table S6.** Syntheses from gel composition  $x\text{NaOH}\cdot 0.750\text{P}_2\text{O}_5\cdot 0.125\text{Al}_2\text{O}_3\cdot y\text{ZnO}\cdot 110\text{H}_2\text{O}^a$ 

| run | gel composition                    |                                   | $t$ (h) | product <sup>b</sup>        |
|-----|------------------------------------|-----------------------------------|---------|-----------------------------|
|     | NaOH/P <sub>2</sub> O <sub>5</sub> | ZnO/P <sub>2</sub> O <sub>5</sub> |         |                             |
| 71  | 6.67                               | 1.33                              | 3       | D                           |
| 72  | 6.00                               | 1.33                              | 3       | D + Na-ZnAPO-CZP            |
| 73  | 5.33                               | 1.33                              | 12      | Na-ZnAPO-CZP + Na-ZnAPO-SOD |
| 74  | 4.00                               | 0.33                              | 12      | Na-ZnAPO-SOD + Na-ZnAPO-CZP |
| 75  | 3.33                               | 0.33                              | 12      | Na-ZnAPO-SOD                |
| 76  | 2.67                               | 0.33                              | 168     | A                           |

<sup>a</sup> $x$  and  $y$  are varied between  $2.00 \leq x \leq 5.00$  and  $0.25 \leq y \leq 1.00$ . Crystallization was performed at 135 °C under rotation (60 rpm). <sup>b</sup>The product appearing first is the major phase. A and D indicate amorphous and dense (i.e., tridymite) phases, respectively.

**Table S7.** Room-temperature CO<sub>2</sub> adsorption data of the SAPO molecular sieves synthesized here.

| Material                   | Framework charge density <sup>b</sup> | CO <sub>2</sub> uptake at 1 bar (mmol g <sup>-1</sup> ) | Selectivity <sup>a</sup>         |                                 |
|----------------------------|---------------------------------------|---------------------------------------------------------|----------------------------------|---------------------------------|
|                            |                                       |                                                         | CO <sub>2</sub> /CH <sub>4</sub> | CO <sub>2</sub> /N <sub>2</sub> |
| Na-SAPO-LTA(1)             | 0.36                                  | 3.8                                                     | 7                                | 12                              |
| Na-SAPO-LTA(4)             | 0.29                                  | 3.6                                                     | 6                                | 10                              |
| Na-SAPO-CHA(17)            | 0.28                                  | 3.6                                                     | 17                               | 36                              |
| Na-SAPO-CHA(19)            | 0.25                                  | 3.3                                                     | 9                                | 13                              |
| Na-SAPO-FAU/EMT(14)        | 0.37                                  | 4.6                                                     | 7                                | 13                              |
| NaTMA-SAPO-FAU(15)         | 0.37                                  | 4.6                                                     | 7                                | 12                              |
| Na-A (Si/Al = 1.0)         | 0.50                                  | 3.5                                                     | 5                                | 8                               |
| Na-chabazite (Si/Al = 2.2) | 0.31                                  | 4.3                                                     | 3                                | 5                               |
| Na-X (Si/Al = 1.3)         | 0.43                                  | 5.8                                                     | 6                                | 9                               |

<sup>a</sup>Defined as  $Q_{\text{CO}_2}/Q_{\text{CH}_4}$  and  $Q_{\text{CO}_2}/Q_{\text{N}_2}$ , where  $Q_{\text{CO}_2}$ ,  $Q_{\text{CH}_4}$ , and  $Q_{\text{N}_2}$  are the equilibrium molar uptakes of CO<sub>2</sub>, CH<sub>4</sub>, and N<sub>2</sub> at 1 bar. <sup>b</sup>(Al-P)/(Si+Al+P) and Al/(Si+Al) ratios for each SAPO and aluminosilicate materials, respectively.



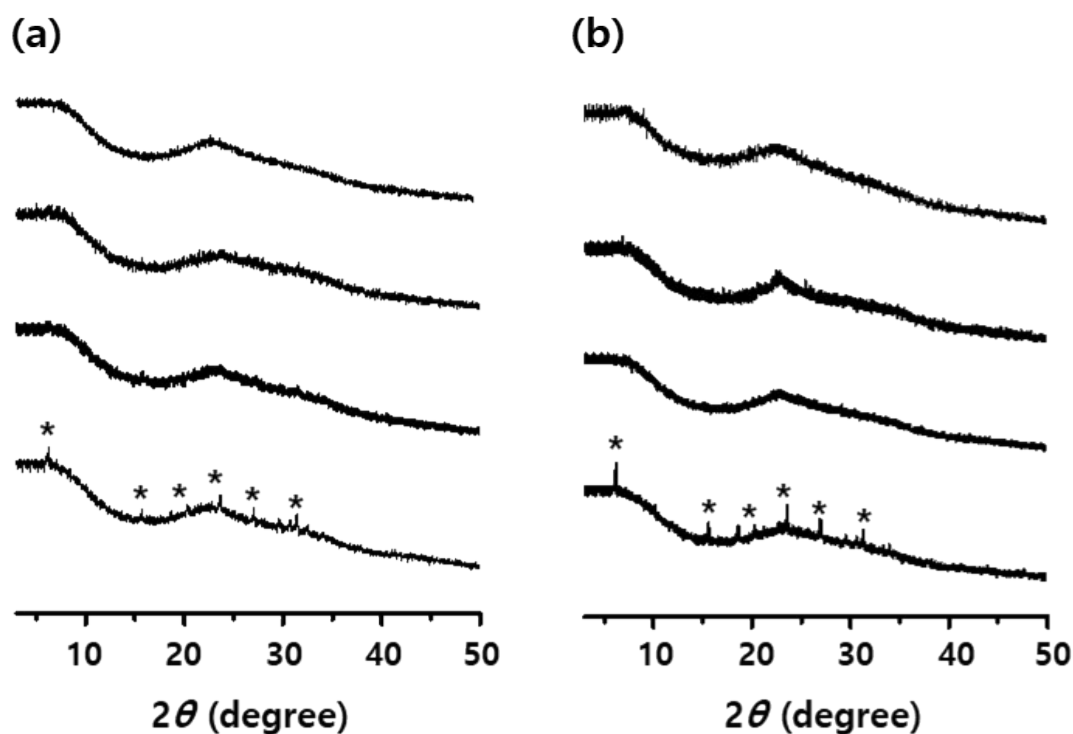

**Fig. S1.** Powder X-ray diffraction (PXRD) patterns of the solids isolated after aging a synthesis mixture with the chemical composition  $4.0\text{NaOH}\cdot 1.0\text{Al}_2\text{O}_3\cdot 0.9\text{P}_2\text{O}_5\cdot 1.0\text{SiO}_2\cdot 150\text{H}_2\text{O}$  for Na-*SAPO-FAU/EMT* formation (run no. 14 in Table 1), where a small amount (4 wt% of the alumina in the gel) of (a) NaY (Si/Al = 2.6) or (b) SAPO-37 (Si/(Si+Al+P) = 0.13) was added as seed crystals, respectively, at room temperature for different times (from bottom to top; 0, 12, and 24 h). The top traces of each panel are the PXRD patterns of the solid products obtained after 24 h of heating under static conditions at 110 °C. The representative X-ray peaks due to the FAU structure are marked by asterisks. It can be seen that no X-ray peaks from seed crystals with the FAU structure are detectable by PXRD when aged at room temperature for 12 h. This indicates the digestion of added seed crystals occurs prior to the formation of Na-*SAPO-FAU/EMT* crystals.

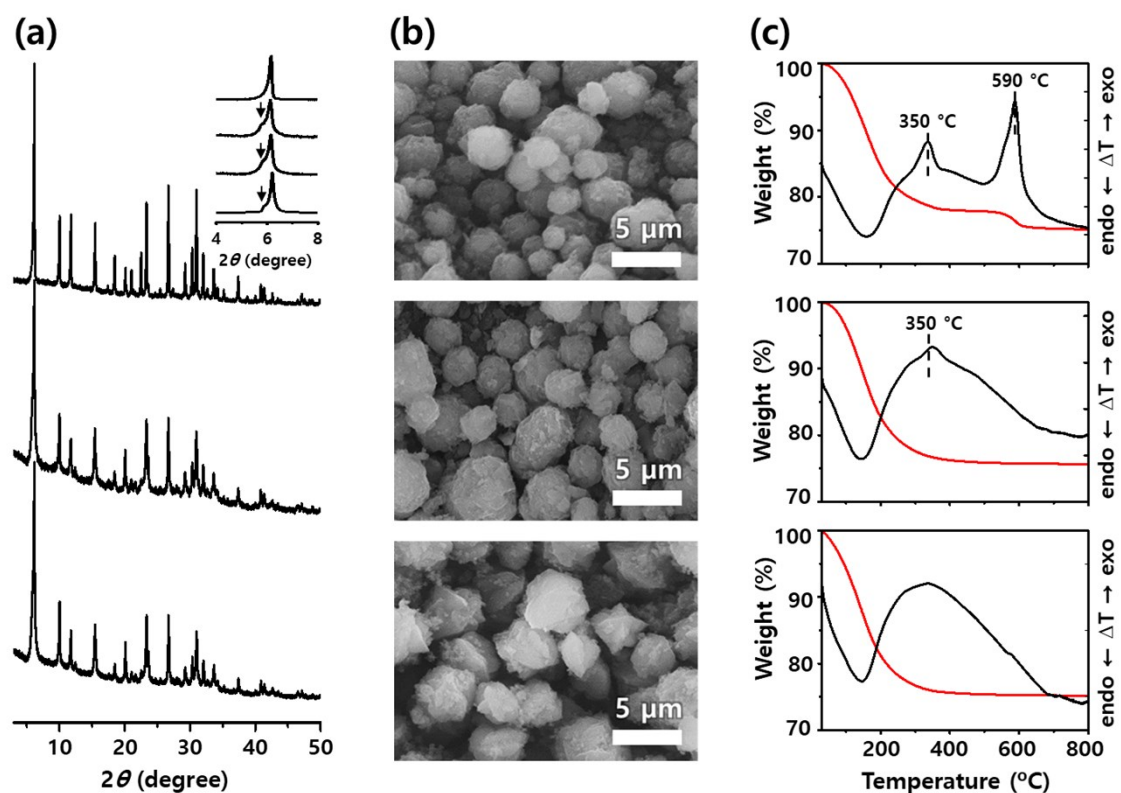

**Fig. S2.** (a) PXRD patterns, (b) SEM images, and (c) TGA/DTA curves of as-synthesized (from bottom to top) Na-FAU/EMT, NaTEA-FAU/EMT, and NaTMA-FAU. The inset in Fig. S2(a) compares the experimental PXRD patterns (from bottom to top among the top three traces) in the  $2\theta$  region  $4\text{--}8^\circ$  of Na-FAU/EMT, NaTEA-FAU/EMT, and NaTMA-FAU with the simulated one (bottom) of a FAU/EMT intergrowth structure at a ratio of 80:20<sup>S1,S2</sup>. The arrow indicates the (100) reflection of the EMT structure. We also note that the intergrowth rate of NaTEA-FAU/EMT is similar to that of NaTMA-FAU/EMT. The TMA cations employed in the synthesis of NaTMA-FAU were found to be within both the *fau* and *sod* cages of the FAU structure. The TEA cations, on the other hand, were too large to be present in the *sod* cages of NaTEA-FAU/EMT, like the case of SAPO-37.<sup>S3</sup>

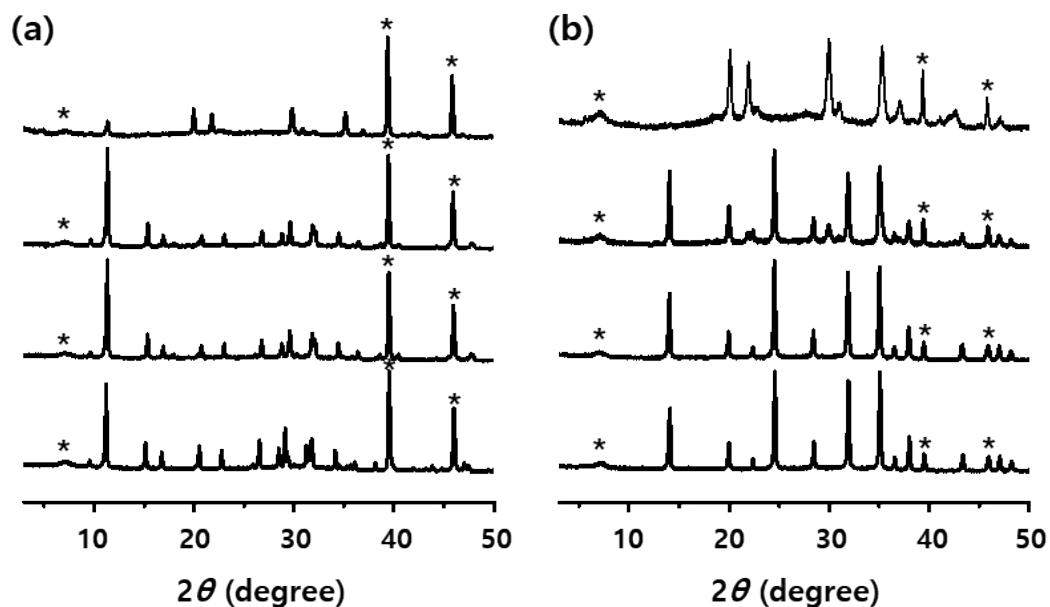

**Fig. S3.** Variable-temperature (VT) PXRD patterns of as-synthesized (a) Na-ZnAPO-CZP(34) and (b) Na-ZnAPO-SOD(35). Each PXRD pattern was recorded at (from bottom to top) 25, 100, 200, and 300 °C under a residual pressure of  $10^{-2}$  Torr. We note that once the temperature is raised above 300 °C, the structural integrity of both ZnAPO molecular sieves was not maintained. This holds true even after cooling down to 25 °C, unlike the case of SAPO materials prepared in this work (See Fig. S4). The X-ray peaks from the (Pt) sample holder are marked by asterisks.

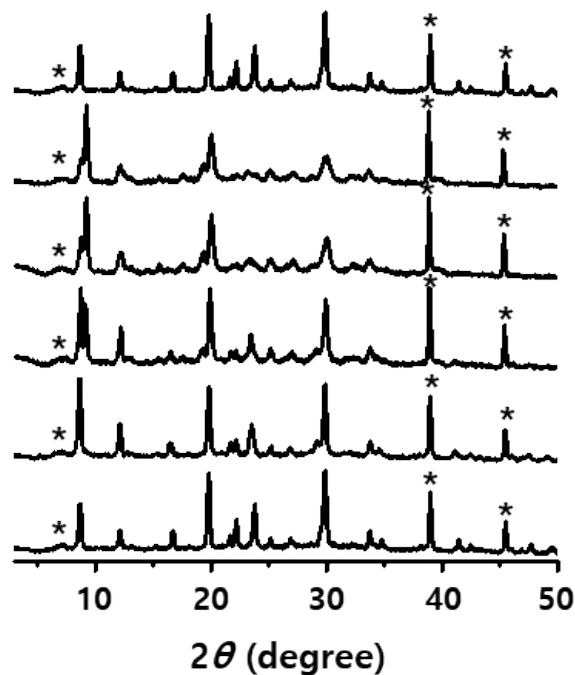

**Fig. S4.** VT PXRD patterns of as-synthesized Na-SAPO-CHA(17). Each PXRD pattern was obtained at (from bottom to top) 25, 100, 200, 300, and 400 °C under a residual pressure of  $10^{-2}$  Torr. The top pattern, collected at 25 °C under ambient pressure after the thermal process, demonstrates that this thermal treatment is not detrimental to the structural integrity of Na-SAPO-CHA(17). However, notable changes in the position and relative intensity of some X-ray peaks are observed during heating from 25 to 400 °C. This suggests that a phase transition is caused by dehydration at 300 °C, which is under investigation in our laboratory. However, the other SAPO molecular sieves (i.e., Na-SAPO-LTA(11), Na-SAPO-FAU/EMT(14), and NaTMA-FAU(15)) showed no detectable changes in their PXRD pattern when subjected to the same thermal treatment conditions. The X-ray peaks from the (Pt) sample holder are marked by asterisks.

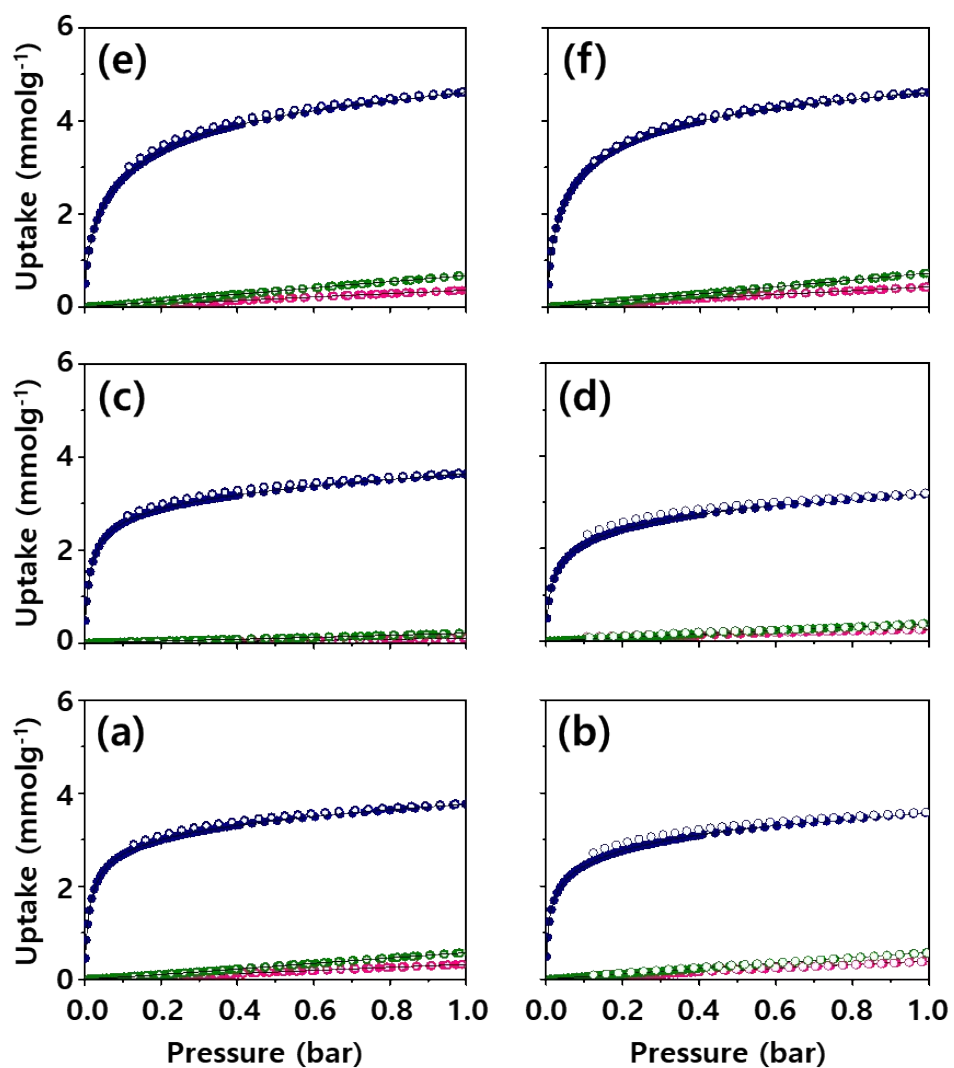

**Fig. S5.** Small gas adsorption isotherms of the SAPO molecular sieves. CO<sub>2</sub> (blue), N<sub>2</sub> (pink), and CH<sub>4</sub> (green) isotherms at 25 °C were recorded on the Na<sup>+</sup>-forms of (a) Na-SAPO-LTA(1), (b) Na-SAPO-LTA(4), (c) Na-SAPO-CHA(17), (d) Na-SAPO-CHA(18), (e) Na-SAPO-FAU/EMT(14), and (f) NaTMA-SAPO-FAU(15).

## References

- S1 C. Baerlocher and L. B. McCusker, Database of Zeolite Structures, <http://www.iza-structure.org/databases/>, accessed March 31, 2021.
- S2 M. M. J. Treacy, D. E. W. Vaughan, K. G. Strohmaier, J. M. Newsam, *Proc. R. Soc. Lond. A* 1996, **452**, 813.
- S3 M. Briend, A. Lamy, M.-J. Peltr, P. P. Man, D. Barthomeuf, *Zeolites* 1993, **13**, 201.
